# Supplementary material
Source: PubMed Central journal article supplement (PMC8410238)
Supplement: 10-1055-s-0041-1735184-s210120r.pdf [file 10-1055-s-0041-1735184-s210120r.pdf]

## Supplementary Table S1

Search strategies

| Medline: 1946 to January week 2, 2021            |                                                                                                                                                                                                                                     |
|--------------------------------------------------|-------------------------------------------------------------------------------------------------------------------------------------------------------------------------------------------------------------------------------------|
| No.                                              | Searches                                                                                                                                                                                                                            |
| 1                                                | machine learning/or deep learning/or supervised machine learning/or support vector machine/or unsupervised machine learning/or neural networks, computer/or deep learning/ or bayes theorem/or algorithms/or latent class analysis/ |
| 2                                                | ((machine or deep) adj3 learn*).ti,ab,kf.                                                                                                                                                                                           |
| 3                                                | perceptron*.ti,ab,kf.                                                                                                                                                                                                               |
| 4                                                | ((algorithm or bayesian) adj3 learn*).ti,ab,kf.                                                                                                                                                                                     |
| 5                                                | classifier*.ti,ab,kf.                                                                                                                                                                                                               |
| 6                                                | (random adj3 forest).ti,ab,kf.                                                                                                                                                                                                      |
| 7                                                | (PyTorch or TensorFlow or Keras or Theano or Caffe or Fastai or "scikit-learn" or "scikit learn" or caret or WEKA).ti,ab,kf.                                                                                                        |
| 8                                                | (Ensemble adj3 (model* or learn*)).ti,ab,kf.                                                                                                                                                                                        |
| 9                                                | (Neural adj3 network*).ti,ab,kf.                                                                                                                                                                                                    |
| 10                                               | (multilayer adj3 perceptron*).ti,ab,kf.                                                                                                                                                                                             |
| 11                                               | ("K-nearest neighbo*" or "K nearest neighbo*").ti,ab,kf.                                                                                                                                                                            |
| 12                                               | ((L1 or L2) adj3 (regularization or regularisation)).ti,ab,kf.                                                                                                                                                                      |
| 13                                               | (Elastic adj3 net*).ti,ab,kf.                                                                                                                                                                                                       |
| 14                                               | (Support adj3 vector adj3 machine*).ti,ab,kf.                                                                                                                                                                                       |
| 15                                               | (Discriminant adj3 analysi*).ti,ab,kf.                                                                                                                                                                                              |
| 16                                               | (Naive adj3 Bayes*).ti,ab,kf.                                                                                                                                                                                                       |
| 17                                               | (Bayes* adj3 network*).ti,ab,kf.                                                                                                                                                                                                    |
| 18                                               | (Random adj3 forest*).ti,ab,kf.                                                                                                                                                                                                     |
| 19                                               | ((Gradient adj3 boost* or Xgboost*).ti,ab,kf.                                                                                                                                                                                       |
| 20                                               | ((adaptive adj3 boost* or AdaBoost).ti,ab,kf.                                                                                                                                                                                       |
| 21                                               | (clinical adj2 predict*).ti,ab,kf.                                                                                                                                                                                                  |
| 22                                               | or/1-21                                                                                                                                                                                                                             |
| 23                                               | ((Dataset* or "data-set*" or data or distribution or domain* or covariate* or concept*) adj3 (drift* or shift*)).ti,ab,kf.                                                                                                          |
| 24                                               | (Calibration adj3 (drift* or shift*)).ti,ab,kf.                                                                                                                                                                                     |
| 25                                               | (Performance adj3 (drift* or drop*)).ti,ab,kf.                                                                                                                                                                                      |
| 26                                               | recalibrat*.ti,ab,kf.                                                                                                                                                                                                               |
| 27                                               | or/23-26                                                                                                                                                                                                                            |
| 28                                               | 22 and 27                                                                                                                                                                                                                           |
| 29                                               | limit 28 to (english language and humans)                                                                                                                                                                                           |
| 30                                               | 28 not 29                                                                                                                                                                                                                           |
| Medline Epub Ahead of Print: to January 15, 2021 |                                                                                                                                                                                                                                     |
| No.                                              | Searches                                                                                                                                                                                                                            |
| 1                                                | ((machine or deep) adj3 learn*).ti,ab,kf.                                                                                                                                                                                           |
| 2                                                | perceptron*.ti,ab,kf.                                                                                                                                                                                                               |
| 3                                                | ((algorithm or bayesian) adj3 learn*).ti,ab,kf.                                                                                                                                                                                     |
| 4                                                | classifier*.ti,ab,kf.                                                                                                                                                                                                               |
| 5                                                | (random adj3 forest).ti,ab,kf.                                                                                                                                                                                                      |
| 6                                                | (PyTorch or TensorFlow or Keras or Theano or Caffe or Fastai or "scikit-learn" or "scikit learn" or caret or WEKA).ti,ab,kf.                                                                                                        |

(Continued)

| <b>Medline: 1946 to January week 2, 2021</b>        |                                                                                                                              |
|-----------------------------------------------------|------------------------------------------------------------------------------------------------------------------------------|
| 7                                                   | (Ensemble adj3 (model* or learn*)).ti,ab,kf.                                                                                 |
| 8                                                   | (Neural adj3 network*).ti,ab,kf.                                                                                             |
| 9                                                   | (multilayer adj3 perceptron*).ti,ab,kf.                                                                                      |
| 10                                                  | ("K-nearest neighbo*" or "K nearest neighbo*").ti,ab,kf.                                                                     |
| 11                                                  | ((L1 or L2) adj3 (regularization or regularisation)).ti,ab,kf.                                                               |
| 12                                                  | (Elastic adj3 net*).ti,ab,kf.                                                                                                |
| 13                                                  | (Support adj3 vector adj3 machine*).ti,ab,kf.                                                                                |
| 14                                                  | (Discriminant adj3 analysi*).ti,ab,kf.                                                                                       |
| 15                                                  | (Naive adj3 Bayes*).ti,ab,kf.                                                                                                |
| 16                                                  | (Bayes* adj3 network*).ti,ab,kf.                                                                                             |
| 17                                                  | (Random adj3 forest*).ti,ab,kf.                                                                                              |
| 18                                                  | ((Gradient adj3 boost*) or Xgboost*).ti,ab,kf.                                                                               |
| 19                                                  | ((adaptive adj3 boost*) or AdaBoost).ti,ab,kf.                                                                               |
| 20                                                  | (clinical adj2 predict*).ti,ab,kf.                                                                                           |
| 21                                                  | or/1–20                                                                                                                      |
| 22                                                  | ((Dataset* or "data-set*" or data or distribution or domain* or covariate* or concept*) adj3 (drift* or shift*)).ti,ab,kf.   |
| 23                                                  | (Calibration adj3 (drift* or shift*)).ti,ab,kf.                                                                              |
| 24                                                  | (Performance adj3 (drift* or drop*)).ti,ab,kf.                                                                               |
| 25                                                  | recalibrat*.ti,ab,kf.                                                                                                        |
| 26                                                  | or/22–25                                                                                                                     |
| 27                                                  | 21 and 26                                                                                                                    |
| <b>Medline In-Process: 1946 to January 15, 2021</b> |                                                                                                                              |
| Searches                                            |                                                                                                                              |
| 1                                                   | ((machine or deep) adj3 learn*).ti,ab,kf.                                                                                    |
| 2                                                   | perceptron*.ti,ab,kf.                                                                                                        |
| 3                                                   | ((algorithm or bayesian) adj3 learn*).ti,ab,kf.                                                                              |
| 4                                                   | classifier*.ti,ab,kf.                                                                                                        |
| 5                                                   | (random adj3 forest).ti,ab,kf.                                                                                               |
| 6                                                   | (PyTorch or TensorFlow or Keras or Theano or Caffe or Fastai or "scikit-learn" or "scikit learn" or caret or WEKA).ti,ab,kf. |
| 7                                                   | (Ensemble adj3 (model* or learn*)).ti,ab,kf.                                                                                 |
| 8                                                   | (Neural adj3 network*).ti,ab,kf.                                                                                             |
| 9                                                   | (multilayer adj3 perceptron*).ti,ab,kf.                                                                                      |
| 10                                                  | ("K-nearest neighbo*" or "K nearest neighbo*").ti,ab,kf.                                                                     |
| 11                                                  | ((L1 or L2) adj3 (regularization or regularisation)).ti,ab,kf.                                                               |
| 12                                                  | (Elastic adj3 net*).ti,ab,kf.                                                                                                |
| 13                                                  | (Support adj3 vector adj3 machine*).ti,ab,kf.                                                                                |
| 14                                                  | (Discriminant adj3 analysi*).ti,ab,kf.                                                                                       |
| 15                                                  | (Naive adj3 Bayes*).ti,ab,kf.                                                                                                |
| 16                                                  | (Bayes* adj3 network*).ti,ab,kf.                                                                                             |
| 17                                                  | (Random adj3 forest*).ti,ab,kf.                                                                                              |
| 18                                                  | ((Gradient adj3 boost*) or Xgboost*).ti,ab,kf.                                                                               |
| 19                                                  | ((adaptive adj3 boost*) or AdaBoost).ti,ab,kf.                                                                               |
| 20                                                  | (clinical adj2 predict*).ti,ab,kf.                                                                                           |

(Continued)

(Continued)

| <b>Medline: 1946 to January week 2, 2021</b>      |                                                                                                                                                                                                                                                                                                                                                                |
|---------------------------------------------------|----------------------------------------------------------------------------------------------------------------------------------------------------------------------------------------------------------------------------------------------------------------------------------------------------------------------------------------------------------------|
| 21                                                | or/1–20                                                                                                                                                                                                                                                                                                                                                        |
| 22                                                | ((Dataset* or “data-set*” or data or distribution or domain* or covariate* or concept*) adj3 (drift* or shift*)).ti,ab,kf.                                                                                                                                                                                                                                     |
| 23                                                | (Calibration adj3 (drift* or shift*)).ti,ab,kf.                                                                                                                                                                                                                                                                                                                |
| 24                                                | (Performance adj3 (drift* or drop*)).ti,ab,kf.                                                                                                                                                                                                                                                                                                                 |
| 25                                                | recalibrat*.ti,ab,kf.                                                                                                                                                                                                                                                                                                                                          |
| 26                                                | or/22–25                                                                                                                                                                                                                                                                                                                                                       |
| 27                                                | 21 and 26                                                                                                                                                                                                                                                                                                                                                      |
| <b>Embase: 1947 to January 15, 2021</b>           |                                                                                                                                                                                                                                                                                                                                                                |
| Searches                                          |                                                                                                                                                                                                                                                                                                                                                                |
| 1                                                 | machine learning/or exp artificial neural network/or bayesian learning/or exp classification algorithm/or classifier/or k nearest neighbor/or exp learning algorithm/or network learning/or exp perceptron/or random forest/or semi supervised machine learning/or supervised machine learning/or exp support vector machine/or unsupervised machine learning/ |
| 2                                                 | (machine adj2 learn*).ti,ab,kw.                                                                                                                                                                                                                                                                                                                                |
| 3                                                 | (PyTorch or TensorFlow or Keras or Theano or Caffe or Fastai or “scikit-learn” or “scikit learn” or caret or WEKA).ti,ab,kw. [****Scikit learn added to original search statement - Caffe** or “Caffe2” included in this search statement adding the the number 2 would not add additional references****]                                                     |
| 4                                                 | ((machine or deep) adj3 learn*).ti,ab,kw.                                                                                                                                                                                                                                                                                                                      |
| 5                                                 | (Ensemble adj3 (model* or learn*)).ti,ab,kw.                                                                                                                                                                                                                                                                                                                   |
| 6                                                 | (Neural adj3 network*).ti,ab,kw.                                                                                                                                                                                                                                                                                                                               |
| 7                                                 | (multilayer adj3 perceptron*).ti,ab,kw.                                                                                                                                                                                                                                                                                                                        |
| 8                                                 | (“K-nearest neighbo*” or “K nearest neighbo*”).ti,ab,kw.                                                                                                                                                                                                                                                                                                       |
| 9                                                 | ((L1 or L2) adj3 (regularization or regularisation)).ti,ab,kw.                                                                                                                                                                                                                                                                                                 |
| 10                                                | (Elastic adj3 net*).ti,ab,kw.                                                                                                                                                                                                                                                                                                                                  |
| 11                                                | (Support adj3 vector adj3 machine*).ti,ab,kw.                                                                                                                                                                                                                                                                                                                  |
| 12                                                | (Discriminant adj3 analysi*).ti,ab,kw.                                                                                                                                                                                                                                                                                                                         |
| 13                                                | (Naive adj3 Bayes*).ti,ab,kw.                                                                                                                                                                                                                                                                                                                                  |
| 14                                                | (Bayes* adj3 network*).ti,ab,kw.                                                                                                                                                                                                                                                                                                                               |
| 15                                                | (Random adj3 forest*).ti,ab,kw.                                                                                                                                                                                                                                                                                                                                |
| 16                                                | ((Gradient adj3 boost*) or Xgboost*).ti,ab,kw.                                                                                                                                                                                                                                                                                                                 |
| 17                                                | ((adaptive adj3 boost*) or AdaBoost).ti,ab,kw.                                                                                                                                                                                                                                                                                                                 |
| 18                                                | (clinical adj2 predict*).ti,ab,kw.                                                                                                                                                                                                                                                                                                                             |
| 19                                                | or/1–18                                                                                                                                                                                                                                                                                                                                                        |
| 20                                                | ((Dataset* or “data-set*” or data or distribution or domain* or covariate* or concept*) adj3 (drift* or shift*)).ti,ab,kw.                                                                                                                                                                                                                                     |
| 21                                                | (Calibration adj3 (drift* or shift*)).ti,ab,kw.                                                                                                                                                                                                                                                                                                                |
| 22                                                | (Performance adj3 (drift* or drop*)).ti,ab,kw. [****performance dr* is too broad as a textword it will also pick up drive which you probably don’t want. In addition most search platforms require a minimum of 3 letters before the truncation symbol to run an efficient search****]                                                                         |
| 23                                                | recalibrat*.ti,ab,kw.                                                                                                                                                                                                                                                                                                                                          |
| 24                                                | or/20–23                                                                                                                                                                                                                                                                                                                                                       |
| 25                                                | 19 and 24                                                                                                                                                                                                                                                                                                                                                      |
| 26                                                | limit 25 to (human and English language)                                                                                                                                                                                                                                                                                                                       |
| 27                                                | 25 not 26                                                                                                                                                                                                                                                                                                                                                      |
| <b>APA PsycInfo: 1806 to January week 2, 2021</b> |                                                                                                                                                                                                                                                                                                                                                                |
| Searches                                          |                                                                                                                                                                                                                                                                                                                                                                |

(Continued)

| <b>Medline: 1946 to January week 2, 2021</b> |                                                                                                                                                                                                                                                                                                                                                                                                                                                                                                                                                           |
|----------------------------------------------|-----------------------------------------------------------------------------------------------------------------------------------------------------------------------------------------------------------------------------------------------------------------------------------------------------------------------------------------------------------------------------------------------------------------------------------------------------------------------------------------------------------------------------------------------------------|
| 1                                            | machine learning/or computational reinforcement learning/or inductive logic programming/or machine learning algorithms/or extreme learning machine/ or unsupervised learning/or deep neural networks/or artificial neural networks/or deep neural networks/or “pattern recognition (computer science)”/or feature extraction/or image analysis/or bayesian analysis/                                                                                                                                                                                      |
| 2                                            | ((machine or deep) adj3 learn*).ti,ab,id.                                                                                                                                                                                                                                                                                                                                                                                                                                                                                                                 |
| 3                                            | perceptron*.ti,ab,id.                                                                                                                                                                                                                                                                                                                                                                                                                                                                                                                                     |
| 4                                            | ((algorithm or bayesian) adj3 learn*).ti,ab,id.                                                                                                                                                                                                                                                                                                                                                                                                                                                                                                           |
| 5                                            | classifier*.ti,ab,id.                                                                                                                                                                                                                                                                                                                                                                                                                                                                                                                                     |
| 6                                            | (random adj3 forest).ti,ab,id.                                                                                                                                                                                                                                                                                                                                                                                                                                                                                                                            |
| 7                                            | (PyTorch or TensorFlow or Keras or Theano or Caffe or Fastai or “scikit-learn” or “scikit learn” or caret or WEKA).ti,ab, id.                                                                                                                                                                                                                                                                                                                                                                                                                             |
| 8                                            | (Ensemble adj3 (model* or learn*)).ti,ab,id.                                                                                                                                                                                                                                                                                                                                                                                                                                                                                                              |
| 9                                            | (Neural adj3 network*).ti,ab,id.                                                                                                                                                                                                                                                                                                                                                                                                                                                                                                                          |
| 10                                           | (multilayer adj3 perceptron*).ti,ab,id.                                                                                                                                                                                                                                                                                                                                                                                                                                                                                                                   |
| 11                                           | (“K-nearest neighbo*” or “K nearest neighbo*”).ti,ab,id.                                                                                                                                                                                                                                                                                                                                                                                                                                                                                                  |
| 12                                           | ((L1 or L2) adj3 (regularization or regularisation)).ti,ab,id.                                                                                                                                                                                                                                                                                                                                                                                                                                                                                            |
| 13                                           | (Elastic adj3 net*).ti,ab,id.                                                                                                                                                                                                                                                                                                                                                                                                                                                                                                                             |
| 14                                           | (Support adj3 vector adj3 machine*).ti,ab,id.                                                                                                                                                                                                                                                                                                                                                                                                                                                                                                             |
| 15                                           | (Discriminant adj3 analysi*).ti,ab,id.                                                                                                                                                                                                                                                                                                                                                                                                                                                                                                                    |
| 16                                           | (Naive adj3 Bayes*).ti,ab,id.                                                                                                                                                                                                                                                                                                                                                                                                                                                                                                                             |
| 17                                           | (Bayes* adj3 network*).ti,ab,id.                                                                                                                                                                                                                                                                                                                                                                                                                                                                                                                          |
| 18                                           | (Random adj3 forest*).ti,ab,id.                                                                                                                                                                                                                                                                                                                                                                                                                                                                                                                           |
| 19                                           | ((Gradient adj3 boost*) or Xgboost*).ti,ab,id.                                                                                                                                                                                                                                                                                                                                                                                                                                                                                                            |
| 20                                           | ((adaptive adj3 boost*) or AdaBoost).ti,ab,id.                                                                                                                                                                                                                                                                                                                                                                                                                                                                                                            |
| 21                                           | or/1–20 [****machine learning terms****]                                                                                                                                                                                                                                                                                                                                                                                                                                                                                                                  |
| 22                                           | ((Dataset* or “data-set*” or data or distribution or domain* or covariate* or concept*) adj3 (drift* or shift*)).ti,ab,id.                                                                                                                                                                                                                                                                                                                                                                                                                                |
| 23                                           | (Calibration adj3 (drift* or shift*)).ti,ab,id.                                                                                                                                                                                                                                                                                                                                                                                                                                                                                                           |
| 24                                           | (Performance adj3 (drift* or drop*)).ti,ab,id                                                                                                                                                                                                                                                                                                                                                                                                                                                                                                             |
| 25                                           | or/22–24                                                                                                                                                                                                                                                                                                                                                                                                                                                                                                                                                  |
| 26                                           | 21 and 25                                                                                                                                                                                                                                                                                                                                                                                                                                                                                                                                                 |
|                                              | Limits used to divide into 2 groups for screening – include if you decide to only review group 1                                                                                                                                                                                                                                                                                                                                                                                                                                                          |
| 27                                           | limit 26 to (human and english language)                                                                                                                                                                                                                                                                                                                                                                                                                                                                                                                  |
| 28                                           | 26 not 27                                                                                                                                                                                                                                                                                                                                                                                                                                                                                                                                                 |
| <b>arXiv: to January 18, 2021</b>            |                                                                                                                                                                                                                                                                                                                                                                                                                                                                                                                                                           |
| Set                                          | Query                                                                                                                                                                                                                                                                                                                                                                                                                                                                                                                                                     |
| 1                                            | (ti:(machine AND learning) AND abs:drift)                                                                                                                                                                                                                                                                                                                                                                                                                                                                                                                 |
| 2                                            | (ti:(machine AND learning) AND abs:shift)                                                                                                                                                                                                                                                                                                                                                                                                                                                                                                                 |
| 3                                            | (ti:(machine AND learning) AND abs:clinical)                                                                                                                                                                                                                                                                                                                                                                                                                                                                                                              |
| 4                                            | 1 or 2 or 3                                                                                                                                                                                                                                                                                                                                                                                                                                                                                                                                               |
| <b>Web of Science: to January 18, 2021</b>   |                                                                                                                                                                                                                                                                                                                                                                                                                                                                                                                                                           |
| Set                                          | Query                                                                                                                                                                                                                                                                                                                                                                                                                                                                                                                                                     |
| 1                                            | TS = ((machine OR deep OR network*) NEAR/3 learn*) OR TS = (artificial NEAR/3 neural NEAR/3 network*) OR TS = (bayes* NEAR/3 learn*) OR TS = (classification NEAR/3 algorithm*) OR TS = (learning NEAR/3 algorithm*) OR TS = perceptron* OR TS = (random NEAR/3 forest) OR TS = (support NEAR/3 vector NEAR/3 machine*) OR TS = (Neural NEAR/3 network*) OR TS = (ensemble NEAR/3 model*) OR TS = (K-nearest neighbo*) OR TS = (K nearest neighbo*) OR TS = ((L1 OR L2) NEAR/3 (regulariz* OR regularis*)) OR TS = (elastic NEAR/3 net*) OR TS = (Support |

(Continued)

(Continued)

|    | Medline: 1946 to January week 2, 2021                                                                                                                                                                                                                                                                                                                                                                              |
|----|--------------------------------------------------------------------------------------------------------------------------------------------------------------------------------------------------------------------------------------------------------------------------------------------------------------------------------------------------------------------------------------------------------------------|
|    | NEAR/3 vector NEAR/3 machine*) OR TS = (Discriminant NEAR/3 analysi*) OR TS = (naive NEAR/3 Bayesian) OR TS = (random NEAR/3 forest) OR TS = (Gradient NEAR/3 boost*) OR TS = Xgboost* OR TS = (adaptive NEAR/3 boost*) OR TS = AdaBoost OR TS = (PyTorch OR TensorFlow OR Keras OR Theano OR Caffe OR Fastai OR "scikit-learn" OR caret OR WEKA) OR TS = (scikit NEAR/1 learn) OR TS = (clinical NEAR/3 predict*) |
| 2  | TS = ((Dataset* or dataset* or data or distribution or domain* or covariate* or concept*) NEAR/3 (drift* or shift*)) OR TS = recalibrate*                                                                                                                                                                                                                                                                          |
| 3  | TS = (Calibration NEAR/3 (drift* or shift*))                                                                                                                                                                                                                                                                                                                                                                       |
| 4  | TS = (Performance NEAR/3 (drift* or drop*))                                                                                                                                                                                                                                                                                                                                                                        |
| 5  | #2 OR #3 OR 4                                                                                                                                                                                                                                                                                                                                                                                                      |
| 6  | 1 AND 5                                                                                                                                                                                                                                                                                                                                                                                                            |
| 7  | TS = human* OR TS = people* OR TS = patient OR TS = patients OR TS = medical* OR TS = clinical*                                                                                                                                                                                                                                                                                                                    |
| 8  | 6 AND 7                                                                                                                                                                                                                                                                                                                                                                                                            |
| 9  | TS = Animal* OR TS = environment* OR TS = tree* OR TS = plant* OR TS = vegetation* OR TS = ecolog* OR TS = geolog* OR TS = industr* OR TS = manufactur*                                                                                                                                                                                                                                                            |
| 10 | 6 NOT 9                                                                                                                                                                                                                                                                                                                                                                                                            |
| 11 | 10 NOT 8                                                                                                                                                                                                                                                                                                                                                                                                           |
| 12 | 8 OR 11                                                                                                                                                                                                                                                                                                                                                                                                            |

Supplementary Table S2 Details of included studies (n = 15)

| Study                 | Year | Age      | Cohort                               | Label                                    | ML algorithm(s)     | Data source    | Single or multiple institution | Number of mitigation strategies | Number of time periods | Calibration deterioration | Discrimination deterioration |
|-----------------------|------|----------|--------------------------------------|------------------------------------------|---------------------|----------------|--------------------------------|---------------------------------|------------------------|---------------------------|------------------------------|
| Feng <sup>28</sup>    | 2020 | Adult    | ICU admissions                       | Mortality                                | Random forest       | EHR            | Single                         | 6                               | 11                     | NA                        | NA                           |
| Adam <sup>22</sup>    | 2020 | Adult    | ICU admissions                       | Mortality                                | 3 different         | EHR            | Single                         | 5                               | 22                     | NA                        | Yes                          |
| Davis <sup>16</sup>   | 2019 | NA       | Inpatient admissions                 | 30-day mortality and acute kidney injury | Logistic regression | Administrative | Multiple                       | 5                               | 3                      | Yes                       | NA                           |
| Davis <sup>24</sup>   | 2019 | NA       | Inpatient admissions                 | 30-day mortality                         | 4 different         | Administrative | Multiple                       | 5                               | 6                      | Yes                       | No                           |
| Nestor <sup>25</sup>  | 2019 | Adult    | ICU admissions                       | In-ICU mortality and long length-of-stay | 4 different         | EHR            | Single                         | 3                               | 10                     | NA                        | Yes                          |
| Siregar <sup>17</sup> | 2019 | Adult    | Cardiac surgery                      | In-hospital mortality                    | Logistic regression | Registry       | Multiple                       | 5                               | 1                      | Yes                       | No                           |
| Nestor <sup>26</sup>  | 2018 | Adult    | ICU admissions                       | Mortality and long length-of-stay        | Random forest       | EHR            | Single                         | 1                               | 10                     | NA                        | Yes                          |
| Su <sup>23</sup>      | 2018 | Adult    | Coronary artery bypass graft surgery | Mortality                                | Logistic regression | Registry       | Multiple                       | 6                               | 1                      | Yes                       | No                           |
| Davis <sup>30</sup>   | 2017 | Adult    | Inpatient admissions                 | Acute kidney injury                      | 7 different         | Administrative | Multiple                       | 1                               | 36                     | Yes                       | No                           |
| Davis <sup>29</sup>   | 2017 | Adult    | Inpatient admissions                 | 30-day mortality                         | 7 different         | Administrative | Multiple                       | 1                               | 28                     | Yes                       | No                           |
| Siregar <sup>18</sup> | 2016 | Adult    | Cardiac surgery                      | In-hospital mortality                    | Logistic regression | Registry       | Multiple                       | 6                               | 5                      | Yes                       | No                           |
| Stroble <sup>27</sup> | 2015 | Adult    | Prostate biopsy                      | Prostate cancer                          | 2 different         | Trial          | Multiple                       | 5                               | 6 to 14                | Yes                       | Uncertain                    |
| Hickey <sup>19</sup>  | 2013 | Adult    | Cardiac surgery                      | In-hospital mortality                    | Logistic regression | Registry       | Multiple                       | 3                               | 5 and 10               | Yes                       | NA                           |
| Janssen <sup>20</sup> | 2008 | Adult    | Surgery                              | Severe postoperative pain                | Logistic regression | Trial and EHR  | Multiple                       | 5                               | 1                      | Yes                       | Uncertain                    |
| Perry <sup>21</sup>   | 2003 | Neonates | Premature babies                     | Mortality                                | Logistic regression | Trial          | Multiple                       | 1                               | 1                      | Yes                       | Uncertain                    |

Abbreviations: EHR, electronic health record; ICU, intensive care unit; ML, machine learning; Pub, published.

**Supplementary Table S3** Quality assessment ( $n = 15$ )

| Attribute                        | Number describing (%) |
|----------------------------------|-----------------------|
| Inclusion and exclusion criteria | 12 (80)               |
| Sample                           | 13 (87)               |
| Response variable                | 8 (53)                |
| Information leakage prevention   | 13 (87)               |
| Data preprocessing               | 8 (53)                |
| Data splitting                   | 13 (87)               |
| Validation metrics               | 12 (80)               |
| Code availability                | 2 (13)                |

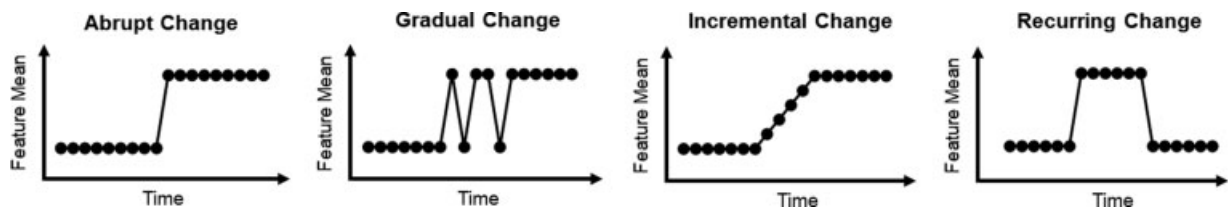

**Supplementary Fig. S1** Examples of change in data distribution over time. Change in data distribution over time illustrated using the mean of a single feature, for example, age. Adapted from Gama et al.<sup>12</sup>

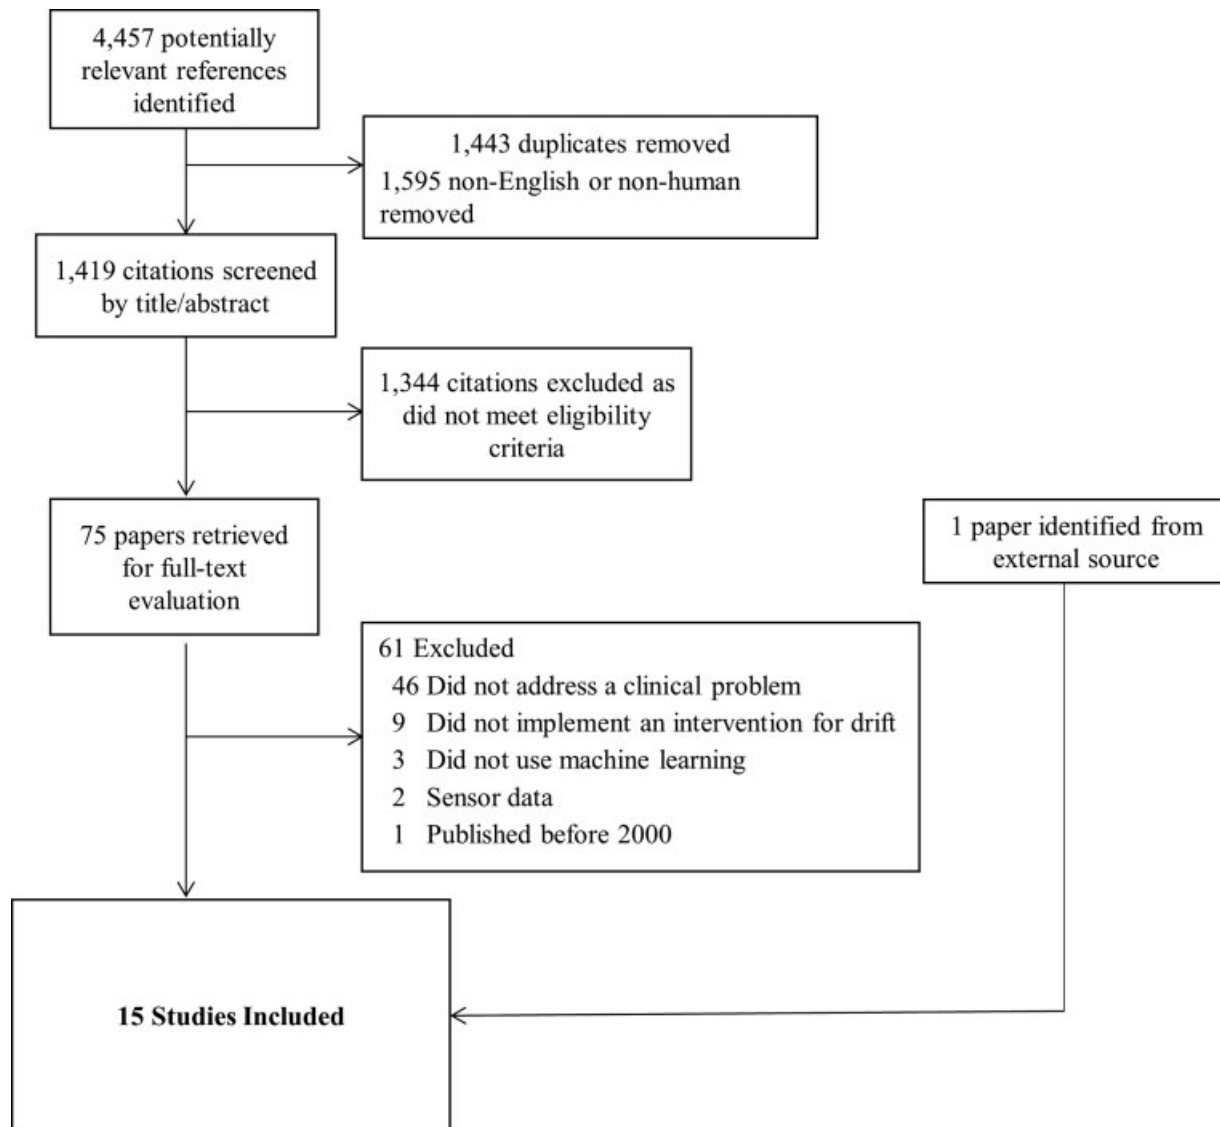

Supplementary Fig. S2 Flow diagram of study identification, selection, and reasons for exclusion.



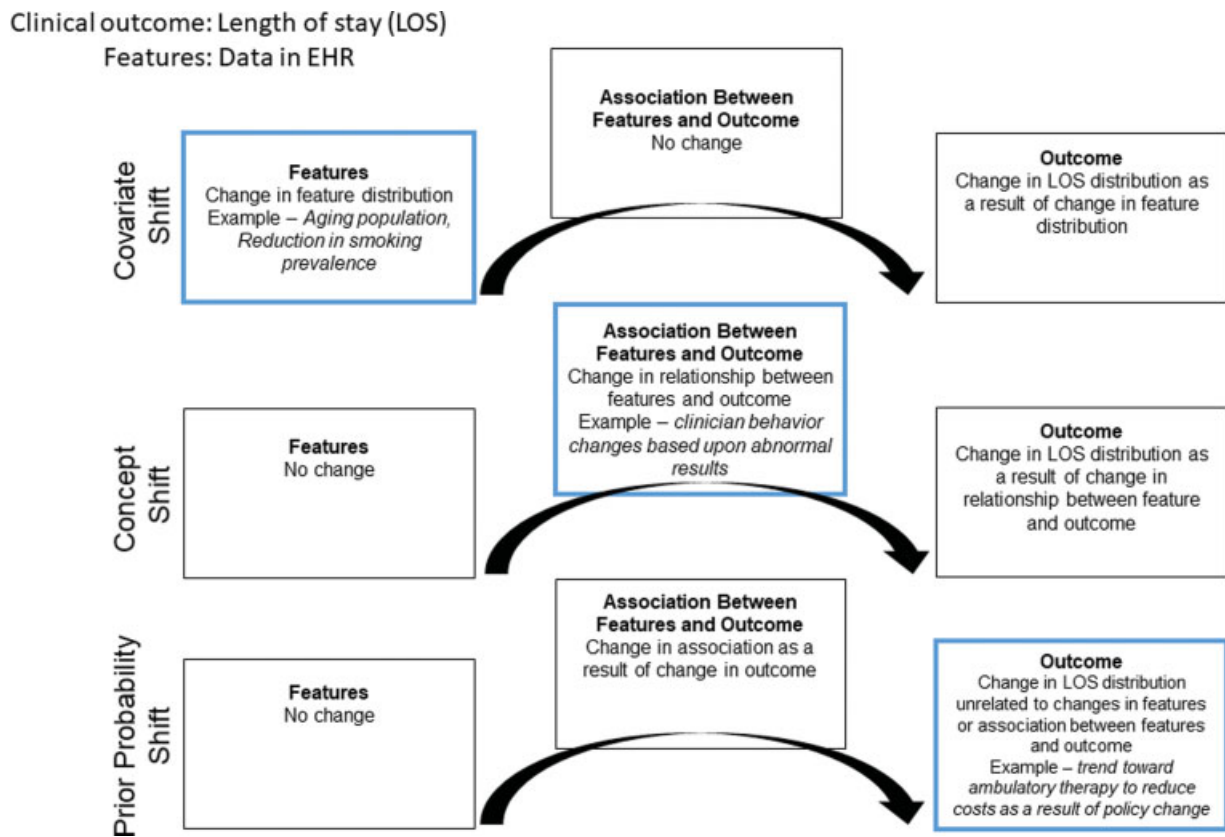

**Supplementary Fig. S3** Figure illustrates types of dataset shift. The arrows in the diagrams imply the assumed direction of influence from features (X) to clinical outcome (Y), that is, an  $X \rightarrow Y$  assumption. Prior probability shift may carry the assumption of a reversed causal relationship in which Y determines X.<sup>9</sup> Such a relationship is more commonly associated with medical imaging where the disease (Y) determines the pattern of pixels (X). In our prior probability shift diagram (row 3), we underscore that the change in clinical outcome is not due to upstream shifts in feature distribution or the association between features and outcome, but because of hidden covariates not represented in the feature space. This change in outcome distribution can subsequently impact the association between features and outcome and may also impact the distribution of features.
